# Supplementary material for: Loss of canonical Wnt signaling is involved in the pathogenesis of Alzheimer's disease
Source: PubMed Central journal article supplement — Neural Regen Res. 2018 Oct;13(10):1705–10. doi: 10.4103/1673-5374.238606 (PMC6128062; doi:10.4103/1673-5374.238606), 2018-10
Supplement: NRR-13-1705_Suppl1.pdf [file NRR-13-1705_Suppl1.pdf]

## PEER-REVIEW REPORT 1

**Name of journal:** Neural Regeneration Research

**Manuscript NO:** NRR-D-18-00240

**Title:** Loss of canonical Wnt signaling is involved in the pathogenesis of Alzheimer's disease

**Reviewer's Name:** Yun-Bae Kim

**Reviewer's country:** Korea

**Date sent for review:** 2018-04-08

**Date reviewed:** 2018-04-15

**Review time:** 7 Days

### COMMENTS TO AUTHORS

In the review, the authors explained the role of dysfunction of Wnt signaling in the amyloidogenesis, as a possible triggering factor of Alzheimer disease (AD). The review may provide readers with a good information on the pathobiology of AD.

- 1) Although Purro et al. (2012) demonstrated that an increased level of the Wnt/ $\beta$ -catenin antagonist Dkk-1 is necessary to produce A $\beta$ -mediated synaptic loss, there is no evidence of relationship with A $\beta$  peptide accumulation and neurotoxicity (independent of A $\beta$  peptide?). It is necessary to clarify whether synaptic failure alone related to impaired Wnt/ $\beta$ -catenin (without A $\beta$ -mediated synaptic loss) can result in memory deficits.
- 2) Although activation of Wnt/ $\beta$ -catenin signaling recovers the hippocampus-dependent cognitive impairment, no detailed mechanism(s) were suggested how acetylcholine, a cholinergic neurotransmitter responsible for memory acquisition, can be restored. It there any reports that Wnt/ $\beta$ -catenin signaling in the cholinergic nervous system plays a role for acetylcholine synthesis via activation of choline acetyltransferase?
- 3) For elimination of accumulated A $\beta$ , enzymes neprilysin and insulysin from microglia are required. It is recommended that any relationship between Wnt/ $\beta$ -catenin signaling and A $\beta$  elimination (via microglial activation?) should be described.
