# Supplementary material for: Loss of canonical Wnt signaling is involved in the pathogenesis of Alzheimer's disease
Source: PubMed Central journal article supplement — Neural Regen Res. 2018 Oct;13(10):1705–10. doi: 10.4103/1673-5374.238606 (PMC6128062; doi:10.4103/1673-5374.238606), 2018-10
Supplement: NRR-13-1705_Suppl2.pdf [file NRR-13-1705_Suppl2.pdf]

## PEER-REVIEW REPORT 2

**Name of journal:** Neural Regeneration Research

**Manuscript NO:** NRR-D-18-00240

**Title:** Loss of canonical Wnt signaling is involved in the pathogenesis of Alzheimer's disease

**Reviewer's Name:** Paulina Carriba

**Reviewer's country:** UK

**Date sent for review:** 2018- 04-08

**Date reviewed:** 2018-04-20

**Review time:** 12 Days

### COMMENTS TO AUTHORS

Authors detail in this manuscript the relevance of Wnt signalling in the onset and evolution of Alzheimer's disease (AD).

The article is really interesting and correctly written. Manuscript is organised with a description of how Wnt is involved in the key pathological hallmarks of the disease and then, the authors develop in a large description such involvement in the production of toxic amyloid fragments; tau hyperphosphorylation; and synaptic and memory effects.

After reading the review it is patent that Wnt signalling is a potential target in AD. In that sense, I miss some information about therapeutic clinical approaches. Does the authors know if there is any clinical trial testing the beneficial effects of Wnt activation? Another interesting question is to know if targeting to Wnt could have any adverse/undesirable effect? In my opinion these two aspects should be introduced in the text.
